# Supplementary material for: Arabidopsis ANGULATA10 is required for thylakoid biogenesis and mesophyll development
Source: PubMed Central journal article supplement (PMC4036511; doi:10.1093/jxb/eru131), 2014-03-24
Supplement: supp_eru131_Casanova_S_ez_et_al_Supplemental_data.pdf [file supp_eru131_Casanova_S_ez_et_al_Supplemental_data.pdf]

Journal of Experimental Botany

**Arabidopsis ANGULATA10 is required for  
thylakoid biogenesis and mesophyll development**

Rubén Casanova-Sáez, Eduardo Mateo-Bonmatí, Saijaliisa Kangasjärvi, Héctor Candela  
and José Luis Micol

**Supplementary Data**

**Author contributions**

H.C. and J.L.M. conceived and designed the research. R.C.S., E.M.B., S.K. and H.C. performed the research. R.C.S, H.C. and J.L.M. wrote the article.

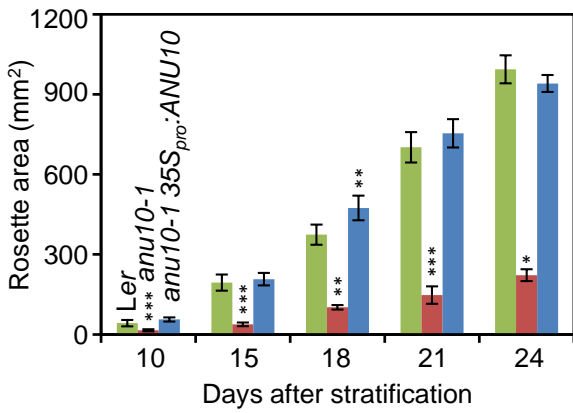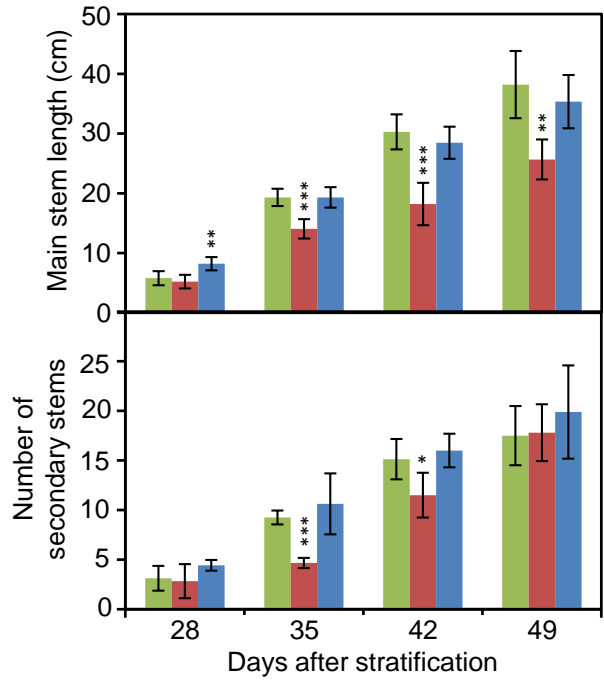

**Supplementary Figure S1.** Growth of the *anu10-1* mutant. Error bars indicate standard deviations. Asterisks indicate values significantly different from Ler in a Mann-Whitney U test (\* $p < 0.05$ , \*\* $p < 0.01$ , \*\*\* $p < 0.001$ ;  $n = 8$ ).

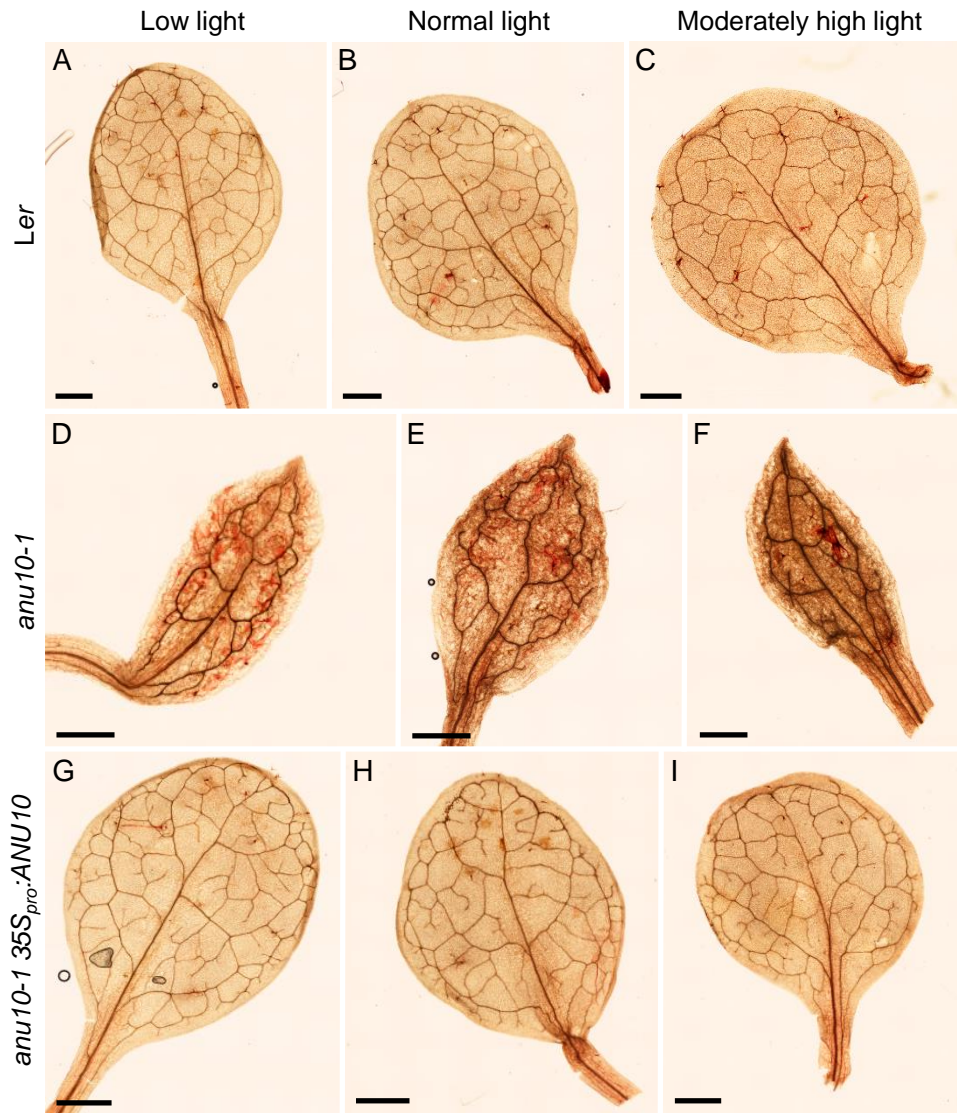

**Supplementary Figure S2.** ROS in *anu10-1* leaves. H<sub>2</sub>O<sub>2</sub> accumulation visualized by DAB staining in first-node leaves from (A-C) *Ler*, (D-F) *anu10-1* and (G-I) *anu10-1 35S<sub>pro</sub>:ANU10* plants collected 16 das. Plants were grown at low ( $\sim 55 \mu\text{mol m}^{-2} \text{s}^{-1}$ ), normal ( $\sim 90 \mu\text{mol m}^{-2} \text{s}^{-1}$ ) or moderately high ( $\sim 180 \mu\text{mol m}^{-2} \text{s}^{-1}$ ) light intensity. Scale bars indicate 1 mm.

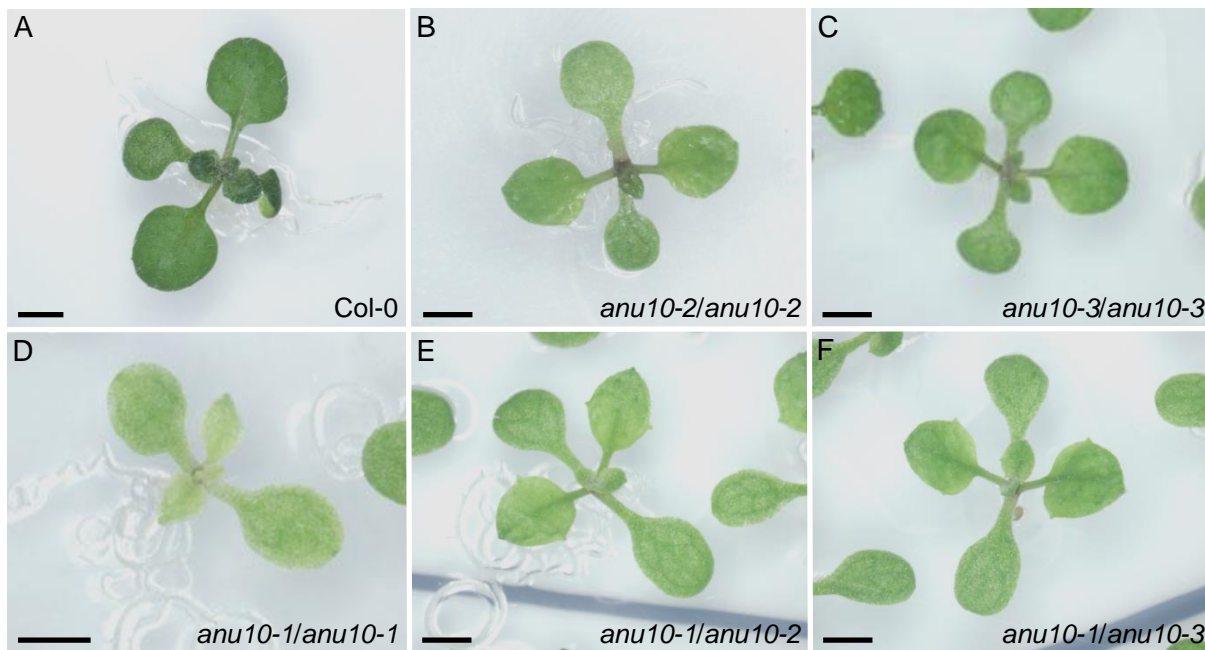

**Supplementary Figure S3.** Rosette phenotype of homozygotes and heterozygotes for the *anu10* alleles. Pictures were taken 10 das. Scale bars indicate 2 mm.

A

```
Ppa XP_001764411.1 1 -----MALSSGSQIVLPYSQSSSGIPWGCFLPRHHARHSQAIRKQLQLDLI
Sbi XP_002451363.1 1 -----MPSPLLRLALPLCPSPNSHS---PRRFAPSP
Osa BAD07831.1 1 -----MPSPLLHHHHHRLSPRFAPS---R---SPSPR
Ata EMT06249.1 1 -----
Tur EMS59110.1 1 -----MEWGSLSRSP-----
Sly XP_004234099.1 1 -----MAFTLTLINSEANSISPETNSAIRKCPFLIRNLH
Cru EOA37571.1 1 -----MASTASSSLFESRNFKS-----VFLIP
Ath NP_174175.2 1 -----MASISTASSSSLLFSPRNFKSI-----PL
Aly XP_002893534.1 1 -----MASVSTACSSSSSLLFSPRNFA-----SIFLIP
Csa XP_004134942.1 1 -----MAISPMALSSYFIQYSEIQTI PARLFA---IPSIYTFKIV
Gma XP_003535421.1 1 -----MTMAIAASSLSSEVLSY---TKFS---NETPR
Gma XP_003541453.1 1 -----MAASSLFSEVLPYTKFSSST-----LR
Mtr XP_003593674.1 1 -----MASVTSTTTTLETFEFLSHRHTTKPF-----LFSPLH
Car XP_004485849.1 1 MKCPAQOEGTQHFSLSLSPMATAMATVATSTTSLETFVPLRSNKF-----LFFETLH
Rco XP_002522507.1 1 -----MASHSLSFSSVFLSPPQSLSR-----TPIKLF
Tca EOY28124.1 1 -----MAFAHSVTLSEAFPTQFPSCFP---RKLFFFETLP
Vvi CBI30631.3 1 -----MAFIHPPARIELLLTFQPRSSST---RILTFEKLL
Vvi XP_002273236.2 1 -----MAFIHPPARIELLLTFQPRSSST---RILTFEKLL
Fve XP_004295562.1 1 -----MTSAHSLLEHPELVSFTRPSRCS-----L
Ppe EMJ12593.1 1 -----MCPGERSGSSGNQNDVVPF-----
Consensus 1
```

```
Ppa XP_001764411.1 48 LHASSCSVRRGKQORALSIRKSAENSAQYEDTRIDTEAGQSWNYAATRTRYKAAASL
Sbi XP_002451363.1 32 TTSSPADRLRLRLTPAASRHTERTSVRAVV-----DGGDLPIARCYEGRRLARL
Osa BAD07831.1 29 TLSLHPAPRLRLRLRLRASARGGGGSTRDHD-----DGA---PIARCYEAAARL
Ata EMT06249.1 1 -----
Tur EMS59110.1 12 -----GKGASPHAVRRLHADRAAA
Sly XP_004234099.1 35 FTLYRNRNRRS-ISC SAQOKPKFKMTEENTLEA---VADFDGDEKSPCIRTYENDLARL
Cru EOA37571.1 24 LRRRSFVSFIRFSKN-----PSAEEDILRF---VAE---SDGMALPCVPTYENNSARL
Ath NP_174175.2 26 LPQQRSSVSF-VRCFSKN---SSTEEDILRF---VAE---SDGMALPCVPTYENNSARL
Aly XP_002893534.1 30 LRRSSVSFIRGYSKN-----SSTEEDILRF---VAE---SDGMALPCVPTYENNSARL
Csa XP_004134942.1 39 LKNSRHCFST-FSCSAGRPI---PTEEEVLOA---VLE---SDEKILPCVPTYENDLARL
Gma XP_003535421.1 27 FTNSKNSIFA-LSCSPKSI---PVTEKEVLOA---IAD---SDGNLPCVPTYDIDLSQL
Gma XP_003541453.1 23 FTNSKNSIFA-LSCSPKSI---PVTEKEVLOA---IAD---SDGNLPCVPTYDNDLSQL
Mtr XP_003593674.1 33 LPNTTPSIFI-LSCSPKTI---FVTEQQVLOA---ISD---SSDOKLPCVPTYENDLARL
Car XP_004485849.1 56 FPNSKYSIFV-LSCSPKTI---FVTEQQVLOA---IAD---SSDOKLPCVPTYENDLARL
Rco XP_002522507.1 30 LTNARNCIPV-LSCST-----FPQOEAILQL---VAN---ADENTLPCIRAFENDLARV
Tca EOY28124.1 34 FRNPTVPLLI-LSRSSPKPA---PSTEPEALKF---ITD---SDGITLPCVPTYENDLARL
Vvi CBI30631.3 34 FKNPRNSLYI-VSCSTPKAI---PATEQEV LDA---IAB---SDEKSLPAVRSENDLARL
Vvi XP_002273236.2 34 FKNPRNSLYI-VSCSTPKAI---PATEQEV LDA---IAB---SDEKSLPAVRSENDLARL
Fve XP_004295562.1 25 FSTPRNSRFTLACSSRKTA---FVTEQEVLOA---ISE---SAEKSLPCVPTYENLARL
Ppe EMJ12593.1 20 -----QQEVLOA---VAD---SDEVLGVRTYENDSACL
Consensus 61
```

```
Ppa XP_001764411.1 108 RVTGNALPLOVN-AALAADGGRTAVQELKQCKAMVLEAYNPGQ-LSEGSTVSTLQOET
Sbi XP_002451363.1 82 ELGAGARRRQAVAAAAADGGARARAYLAAGSDAMVVEAFLPQSHGGGTTASSTRVILQA
Osa BAD07831.1 79 DLSGTARRRQAVAAAAADGGAAFAHLLAAVADAMVVEAFLPQDARRSAMSTRVILQA
Ata EMT06249.1 1 -----MVMEAFLPQA---GCAASTRILQA
Tur EMS59110.1 31 NFGHTEAPRMSV-LQMRKRWGREDKGSARVATRAMET-----LQA
Sly XP_004234099.1 90 TLVGAVDFOQAL-TAAAADGGEAAGEHTAAGMDAMVVETLFPGP-SDEHSTVSTRLEFLPA
Cru EOA37571.1 71 SLVGTVAFDQAL-TAAAADGGEAADDHLRENVPMVVETVFPFG-SDEKATVSTRLEFLPT
Ath NP_174175.2 75 SLVGTVAFDQAL-TAAAADGGEAADDHLRENVPMVVETVFPFG-SDEKATVSTRLEFLPT
Aly XP_002893534.1 77 SLVGTVAFDQAL-TAAAADGGEAADDHLRENVPMVVETVFPFG-SDEKATVSTRLEFLPT
Csa XP_004134942.1 90 SLVGVDFRQSV-TAAAADGGEAATEHLDSDGMSAMVVETVFPGT-SDEHSTVSTRLEFLPA
Gma XP_003535421.1 78 TLVGTVDFOQAL-TAAAADGGEVATDHDIDAGMDAMVVETVFPAP-SCDHATVSTRLEFLPA
Gma XP_003541453.1 74 TLVGTVDFOQAL-TAAAADGGEVADHDIDAGMDAMVVETVFPAP-SSDHATVSTRLEFLPA
Mtr XP_003593674.1 85 TLVGAVDFRQAV-TAAAADGGEVADHDVQAGMDAMVVETVFPAS-SSDHGTVSTRLEFLPA
Car XP_004485849.1 108 TLVGAVDFRQAV-TAAAADGGEVASEHIDASMDAMVVETVFPAS-SSDHGTVSTRLEFLPA
Rco XP_002522507.1 76 SLVGSVGFDOAV-VAAAADGGRAADHDIDSGAPAMVVETLFPGP-GDHHATVSTRLEFLPA
Tca EOY28124.1 85 TLVGAVGFEQAL-TAAAADGGRAATEHVDSGIPAMVETVFPSS-IAKNATVSTRLEFLPA
Vvi CBI30631.3 85 TMVGAIDVEQAL-TAAAADGGNTADEHTASGAMAMVVETVFPGA-SDEHSTVSTRLEFLPA
Vvi XP_002273236.2 85 TMVGAIDVEQAL-TAAAADGGNTADEHTASGAMAMVVETVFPGA-SDEHSTVSTRLEFLPA
Fve XP_004295562.1 77 GAVGAVDFOQAL-TAAAADGGEAADDHLRENVPMVVETLFPGN-SDPYSTVSTRLEFLPA
Ppe EMJ12593.1 49 ALVGAVDFOQAL-TAAAADGGQAADEHTISSGIPAMVVETLFPGH-SDEHSTVSTRLEFLPA
Consensus 121
```

Ppa XP\_001764411.1 166 LAVIERA-KLMAEKDAQFLRGGR-----AFAVAGQTVRLKLSKFEILCFYQPGM'ATDG  
Sbi XP\_002451363.1 142 REVKDKASKLEKQFGYDFFANESDSESMLAMAFQVVIQRLSNRERLEVFSPGSRVHFQD  
Osa BAD07831.1 139 NEVTEKASKLKDITGTEFFSENEPDAESVLAMAFQVVMQDQLTNERLEVFSPGSEIDIQD  
Ata EMT06249.1 23 REVKEKAAKIKKDFGDDIFSENEPDSSESILAMALQOVVMHKLSNRLEIFSPGSGRDFQD  
Tur EMS59110.1 70 REVKEKAAEIKKDFGDDIFSENEPDSSESILAMALQOVVMOKLSNRLEIFSPGSGRNQD  
Sly XP\_004234099.1 148 RKVMEKAHKLRSLITIKEMLSGTT--STNILAMTFROVVLQHLWNFQLVLFIPGTERNMDD  
Cru EOA37571.1 129 RKVKERAKKLRSLSEDLSSGDL--SKNILAMTFROVVLQOLWNEQLVLFQPGAEREMGD  
Ath NP\_174175.2 133 RKVKERAKKLRSLSEDLSSGDL--SKNILAMTFROVVLQOLWNEQLVLFQPGAEREMGD  
Aly XP\_002893534.1 135 RKVKERAKKLRSLSEDLSSGDL--SKNILAMTFROVVLQOLWNEQLVLFQPGAEREMGE  
Csa XP\_004134942.1 148 RKVTEKATKLRSLAQDFNSSTE--SKNILAMTFROVVLQOLWDFQLVVFQTPGSDRNMED  
Gma XP\_003535421.1 136 RKVKEKAAKLRNRFPKDLFSGSG--SKNVLAMTFROVVLQOITWSEFLVTFQPGEEERKMVD  
Gma XP\_003541453.1 132 RKVKEKATKLRSEFPKDAFSGSA--SKNVLAMTFROVVLQOITWSEFLVTFQPGEEERKMD  
Mtr XP\_003593674.1 143 RKVKEKAAKLRSESEDI FSNIT--SRNVLMTFROVVLQOVWNEFLVTFQPGEEERKMD  
Car XP\_004485849.1 166 RKVKEKAAKLRSLSQDMFSNIT--SRNVLAMTFROVVLQOVWNEFLVTFQPGEEERKMD  
Rco XP\_002522507.1 134 RKVKEKAAKLRSEFKEDIFSGTA--SENILAMTFROVVLQOLWNEFLAVFRPGTERNMED  
Tca EOY28124.1 143 RKVKEKAQKLRSLSEDI LITETS--SKNILAMTFROVVLQKFWNEFLVLFERPGTERNMED  
Vvi CBI30631.3 143 RKVKEKANRLRSETEDEFLLSST--SKDILAMTFROVVLQOLWNEFLVLFIPGTERNMEE  
Vvi XP\_002273236.2 143 RKVKEKANRLRSETEDEFLLSST--SKDILAMTFROVVLQOLWNEFLVLFIPGTERNMEE  
Fve XP\_004295562.1 135 RKVKEKAGKLRSLITQDMLSTTT--SRNILAMTFROVVLQOLLWNEQLVVERPGTERNMKD  
Ppe EMJ12593.1 107 RKVKEKAGKLRSLITQDMLSTAT--SRNILSMTFROVVLQOLLWNEFLVIFRPGTERNMED  
Consensus 181 ..\*...\*

Ppa XP\_001764411.1 220 YG-----GEIAAFLEVSDASCISELAKGVCSYALACVKDNAEQAKVEGFGSIP-----  
Sbi XP\_002451363.1 202 FGKFKOK-GSLDCISSSNGKLISSLAEATFYCVI-----EDARANHGGVGS-----  
Osa BAD07831.1 199 LSKPRK-VPADFISRSSDEKLI AALAEATFSCVI-----EDARNNLGGTGG-----  
Ata EMT06249.1 83 WSKPRK-VPVDFISSSDGLKLI SALAEATFSCVI-----EDTEKSLFGGTGG-----  
Tur EMS59110.1 130 WSKQRK-VPVDFISSSDGLKLI SALAEATFSCVI-----EDTEKSLFGGTGG-----  
Sly XP\_004234099.1 206 LETPRE-VPPSEALSSDERVISVLAEVICISAL-----ESTKHEFNGTGGGAPKKEFR  
Cru EOA37571.1 187 FENPRE-VSTSFLLSSDTERVISVLAEVICISAL-----OSTEKHEFLDYLGLKAKFPFK  
Ath NP\_174175.2 191 FENPREQVSTSFLLSSDTERVISVLAEVICISAL-----OSTEKHEFLDYLGLKAKFPFK  
Aly XP\_002893534.1 193 FENPREQVSTSFLLSSDTERVISVLAEVICISAL-----OSTEKHEFLDYLGLKAKFPFK  
Csa XP\_004134942.1 206 LENPRE-VPISFLLSSSEERAI SVLAETVCMCAL-----QNTGKFLVDGTSRGTSTRLEG  
Gma XP\_003535421.1 194 LETPRE-VPASEALSSADEYLISVLAEAICISAL-----QSTQIQFLKVKKGNRGGFGR  
Gma XP\_003541453.1 190 LETPRE-VHASEALSSDEYLISVLAEAICISAL-----QSTQIQFLKAKGNRGGFGR  
Mtr XP\_003593674.1 201 LENPRE-VPASFLLSSDEYLISVLAEVVICISSL-----QSTQIQFLKSDGSRSGFGR  
Car XP\_004485849.1 224 LENPRE-VPASFLLSSDEYLSVLAEVVICISAL-----QNTQIQFLDKSQGSRSGFGR  
Rco XP\_002522507.1 192 LENPRE-VPASFLLSSDEHILISVLAEAITYIAL-----QNTESNFLYDFMGETSGGVFR  
Tca EOY28124.1 201 LENPRK-VLCSFLLSSSEERVISNLEVVVICISAL-----OSTERHEFLNFLGKTSNNEFQ  
Vvi CBI30631.3 201 LQDSRKQVPASFLLSSDDEGVISVLAEVICISAL-----QOTTERHEFLNLLGQTSNNEFK  
Vvi XP\_002273236.2 201 LQDSRK-VPASFLLSSDDEGVISVLAEVICISAL-----QOTTERHEFLNLLGQTSNNEFK  
Fve XP\_004295562.1 193 LENARE-VPACVLLSSSDEHILISVLAEVVICISAL-----QNTERQFLDYGKTPSDLLH  
Ppe EMJ12593.1 165 LENPRE-VPPSFLLSSDERIISVLAEVVICISAL-----ENTERQFLDFMGKTKSNLVR  
Consensus 241 .....

Ppa XP\_001764411.1 269 ELKRSSEGIKTVKNSIVQISSFTAEVSAHVERTVQDKKLVGTSVGLRRHRS---WVNRP  
Sbi XP\_002451363.1 248 LEQKROLDYS--MDSSVCIHRISEAEVVKNAKRCLETISLIKSSHVHETKNG--WVPPP  
Osa BAD07831.1 245 LSHKWKSNCS--LDSSVCIDIISEEVVNSARRRLESEDLVQSSHVAGAKNG--WVPPAP  
Ata EMT06249.1 129 EFQSQKLNCS--SDSTVVCVHRISAEVANNARRCLESEFNLTSSSHEVGRKKNV--WVPPAP  
Tur EMS59110.1 176 EFQSQKLNCS--SDSTVVCVHRISAEVANNARRCLESEFNLTSSSHEVGRSKNA--WVPPAP  
Sly XP\_004234099.1 260 WEDTHKSIIVS--KDSSVTLNLMYEIVANANVLLQKESSEERANYEPREGRWGMNLTST  
Cru EOA37571.1 241 WBSKHKRIAS--EDSSVVLHKLFEDE--QNTNHLLEYQOSREKFKLADTRQSRRWNMS  
Ath NP\_174175.2 246 WLSKRRRIAS--EDCSVVLHKLFEDE--QNTKLLLEYQOSRKENFKLADTRQSRRWNMS  
Aly XP\_002893534.1 248 WLNKHKRIAS--EDCSVVLHKLFEDE--PNTNLLLEYQOSRKENFKLADTRQSRRWNLS  
Csa XP\_004134942.1 260 WBRKSTIVAS--KDSSVVIHKLFEDEI--ADPKSLLQKENSNKESKHKRNSKSMNYWVMP  
Gma XP\_003535421.1 248 WBRKPESVQS--KDSAVIILSKLFEDEIVENARSLLNLYNLMKDGKPKVKIKSGHHWVKSS  
Gma XP\_003541453.1 244 WFOKPESVQS--KDSAVIILSKLFEDEIVENARSLLNLYNLMKDGKPKVKIKSGHHWVKFS  
Mtr XP\_003593674.1 255 WFOKHERIOS--KDSAVIILHKLFEDEIVENARSLLKYLHLMKDGKPKVKIKSERFWVKFS  
Car XP\_004485849.1 278 WFOKPERIOS--KDSAVIILHKLFEDEIVENAKSLLNLYHLMKDGKPKVKIKSGPFWVKFS  
Rco XP\_002522507.1 246 WFOKPKSIAS--QDSSVVIYKLFEDETAGNAKLLLEDENLSKD--KGIKLRQKYKWWTPV  
Tca EOY28124.1 255 WBRKSKAIES--KDLSSVVIYKLFEDIVENAKSLLSENSSESFKMLDLRRKDYWVTPS  
Vvi CBI30631.3 256 WBRKPKSVAS--KDSSVIMYELFEDEIVENAKNLLNENNSMKANKCIEKTKKYHWWTSS  
Vvi XP\_002273236.2 255 WBRKPKSVAS--KDSSVIMYELFEDEIVENAKNLLNENNSMKANKCIEKTKKYHWWTSS  
Fve XP\_004295562.1 247 SBRKPRRIVS--KDSSVVIYKLFEDIVENAKSLLNENNSAKNSKSVKTKSK--WVTPS  
Ppe EMJ12593.1 219 WBRKPKRTVS--KDSSVVIYKLFEDIVENAKSLLKFNENLTGSKPKPKTKSKYYRWAT  
Consensus 301 ..\*...\*

Ppa XP\_001764411.1 326 LAEAVVKSGL--AQLVDEFI PAHRLQLN---LPSNKFEAVGLOKLSDTVCSINLTHAQM  
Sbi XP\_002451363.1 304 HYETLVKIGGPELVLWANEPYIPYRLOINANALENSNHE--GLFELESNRWEVLLSHSQM  
Osa BAD07831.1 301 KSERLVKIGGPEMLWASEFVYTYRLOIDAKAFKNTKLG--CHELVANNKGEVLLSHAQM  
Ata EMT06249.1 185 KYGRLAEIGGPEFILWAHEFVPSYRLOINANAFENTKLE--GCELVNNRWEVPISEHQL  
Tur EMS59110.1 232 KYGRLAEIGGPEFILWAHEFVPSYRLOINANAFENTKLE--GCELVNNRWEVPISEHQL  
Sly XP\_004234099.1 318 TYEKLEQIGGPEFISWLSERVPAYLQIDAELDNKKEE--GWRKETAINTWEVFLTHSQM  
Cru EOA37571.1 297 ANSKLEKFGGPEFSTWASEYIPAYRLEIDTTILADAKLE--GWRKSSSENKWEVLLTHSQM  
Ath NP\_174175.2 302 ANSKLEKIGGPEFSSWASEYIPAYRLEMDSTILADAKLE--GWRKSSSENKWEVLLTHSQM  
Aly XP\_002893534.1 304 ANSKLEKIGGPEFSSWASEYIPAYRLEIDTIIILADAKLE--GWRKSSSENKWEVLLTHSQM  
Csa XP\_004134942.1 317 ELTRLEKIGGPEFCAWVSEYVPAAYRLOIDAHQFNGLKKEG--GWRFEVENRWEVLLTHSQM  
Gma XP\_003535421.1 306 CYEKLEKIGGPEFSAWASEYVPAAYRLEIDTKILGDSKIG--GWRKSAENRWEVLLTHSQM  
Gma XP\_003541453.1 302 CYEKLEKIGGPEFSAWASEYVPAAYRLEIDTKILGDSKIE--GWRKSAENRWEVLLTHSQM  
Mtr XP\_003593674.1 313 SYEKLEKIGGPEFSAWTSEYVPAAYRLEIDPKILGDSKEQ--GWRKSSSENKWEVLLTHSQM  
Car XP\_004485849.1 336 CYEKLEKIGGPEFSAWTSEYVPAAYRLEVDTKILGDAKFO--GWRKSSSENKWEVLLTHSQM  
Rco XP\_002522507.1 302 ALSKLETIGGPEFSAWVSEYVPAAYRLOIDADIVKDAKME--GWRFECDNRWEVLLTHSQM  
Tca EOY28124.1 313 MHSKLDKIGGPEFSSWASEYIPAYRLEINANTLKDKEE--GWRKSSSENKWEVLLTHSQM  
Vvi CBI30631.3 314 ALSKLEKIGGPEFSTWTSEYIPAYRLOIDPDKLKSVKFE--GWRKSAENRWEVLLTHSQM  
Vvi XP\_002273236.2 313 ALSKLEKIGGPEFSTWTSEYIPAYRLOIDPDKLKSVKFE--GWRKSAENRWEVLLTHSQM  
Fve XP\_004295562.1 303 ALSKLEKIGGPEFSCWTSEYVPAAYLQIDANRHKDKKEE--GWRKCEETSWEVLLTHSQM  
Ppe EMJ12593.1 277 ALSKLEKIGGPEFSSWTSEYVPAAYRLOIDANQHKDKKEE--GWRKSAENWCEVFLTHSQM  
Consensus 361 .....\*.....\*.....\*.....\*.....\*.....\*.....\*.....\*.....\*.....\*

Ppa XP\_001764411.1 382 MDLADVLDLYSGDPIYTGSGESVSMSS-----DIPRR-----SWAKVVO-TVAVGALATA  
Sbi XP\_002451363.1 362 VELGNILDMYEDQFTLPCKTF-----HPHNSDPSKIKKNNGYLNNLFTFLAGSCIEFIF  
Osa BAD07831.1 359 VELANILDMYEDQFTLPCKTF-----YSNNSEPSKIKKNNGYLNNLFFALLAGSSIVFL  
Ata EMT06249.1 243 VELGNVVDMYEDQFTIPCKTF-----RSHNAEPSKIRRNNGYLNNLFSFLAGCSVIFFI  
Tur EMS59110.1 290 VELGNVVDMYEDQFTIPCKTF-----RSHNAEPSKIRRNNGYLNNLFSFLAGCSVIFFI  
Sly XP\_004234099.1 376 VGLSDVLDMYEDYIYLPYKQLSCGV-VAKSFNSPSS-KRSISMSRATSMVLAGSIFLVA  
Cru EOA37571.1 355 VGLAEALDIYEDYISLPKQLPCDV-PCNYANLPNE-KRGLSLKFTISVTMASGIFLLA  
Ath NP\_174175.2 360 VGLAEALDIYEDYISLPKQLPCDV-PCNYANLPNE-KKGLSLKFTISVTMASGIFLLA  
Aly XP\_002893534.1 362 VGLAEALDIYEDYISLPKQLPCDV-PCNYANLPSE-KRGLSLKFTISVTMASGIFLLA  
Csa XP\_004134942.1 375 VGLANILDMYEDYISLPDKQLCCGA-NVHSANLSE-KRNYSSWGLSKTLGAGFLVA  
Gma XP\_003535421.1 364 VQLAETLDTIYYVDPYSLPNKQLSCGV-AAKFAVNSNK--KGNSFPKFLSALASGIFLVA  
Gma XP\_003541453.1 360 VQLAETLDTIYYVDPYSLPYKQLSCGV-AAKFAVNSNK--KGNSFPKFLSALASGIFLVA  
Mtr XP\_003593674.1 371 VGLAETLDMYEDYIYLPDKELSYGV-AAKFAVNSNK--KGSSSKILSVSLASGIFLVA  
Car XP\_004485849.1 394 VSLAETLDMYEDYIYLPDKQLSCGV-VAEYVNVSSR-KVRLYLSKFLSVTLATGMFLVA  
Rco XP\_002522507.1 360 AGLAETLDMYEDYISLPKQLSCRA-TANETINANT-KKSSSWLRELSVSLISGIFLLA  
Tca EOY28124.1 371 VGLADILDYIYEDYISLPKQLRCGV-VANVNSLSKA-KRSSSFSRMVSATVASGIFLIT  
Vvi CBI30631.3 372 VALANILDMYEDYIYLPDKQLCCGAGFANFTNSKN-KRISSLKFLTISTIASGIFLVA  
Vvi XP\_002273236.2 371 VALANILDMYEDYIYLPDKQLCCGAGFANFTNSKN-KRISSLKFLTISTIASGIFLVA  
Fve XP\_004295562.1 361 VGLADILDYIYEDYIYLPDKELSCGD-IASETINNSNK-KTGSFLKFLSVSLASGIFLVA  
Ppe EMJ12593.1 335 VGLADILDYIYEDYIYLPDKQLSCGV-VANSTINNSNK-KMGSFILRLMSVTLASGIFLIT  
Consensus 421 ..\*.....\*.....\*.....\*.....\*.....\*.....\*.....\*.....\*.....\*

Ppa XP\_001764411.1 430 IG--CALLAGFSSRRARLGQMDAPIESIFDMAFSQKIREIGRSD----IVDEQMSVNO  
Sbi XP\_002451363.1 417 VTCFARLCWERSFDKMLFNEISNVSSSONYCSDIKSLDNSEIQAVCTSLVKKIKDSVGC  
Osa BAD07831.1 414 VGALAQLCWEPQSLKDKRLATVSSVSSSQSYCSDIHSLDSSLEQAVCVSVVEKIKDSVGC  
Ata EMT06249.1 298 VGVVAQLCWEPQSLKDKRLFMGSSPTSSSQSYCSDVHSLDNSEVRGVCISVVKIKDSCCC  
Tur EMS59110.1 345 VGVVAQLCWEPQSLKDKRLFMGSSPTSSSQSYCSDVHSLDNSEVRGVCISVVKIKDSCCC  
Sly XP\_004234099.1 434 TRILGQRYLPYPIRKHYHPGVNPNSSDMISIQPSSMESCKLEDVSVVRRIKELFCW  
Cru EOA37571.1 413 VSAAAQFCFPQ-KSERKYPGRSQDLWSENELLSHSSDSSKLEDFCGLLVVKIKDASVW  
Ath NP\_174175.2 418 VSAAAQFCFPQ-KSERKYPGRSQDLWSESELSSHSSDSSSELSDFCGLLVVKIKDASVW  
Aly XP\_002893534.1 420 VSAAAQFCFLPH-KSERKYPGRSQDLWLESELSSHSSDSELSDFCGLLVVKIKDASVW  
Csa XP\_004134942.1 433 TCAVGQRFMSRRLPGRYSAEQPITSLDGLSSVKDCAEAAKLEFVCTISVVKIKDASVW  
Gma XP\_003535421.1 421 ISALGQFCFLPWCKERKHSVEHRSFSSSEVDVAINDFFDTQKLEECVLAIAKAKGTDFGW  
Gma XP\_003541453.1 417 ISALGQFCFLPWCKERKHSVEHRSFSSSEVNVAMNDFDTKKLEECVLAIAKAKGTDFGW  
Mtr XP\_003593674.1 428 ISALGQFCFLPRSKERKHTVEHRSFSTSEVNV-MHDFELDTKVEEFCVSAVAKIKDASVW  
Car XP\_004485849.1 452 ISALGQFCFLPRSKERKHPVEHRSFSTSEVNI-MHDILDTKVEEFCVPAVAKIKDASVW  
Rco XP\_002522507.1 418 ISAFSRFYEPHFKQOTYNQEHRSFSSSEIHSVNESLHAEKLOEFCILTVKKIKDASVW  
Tca EOY28124.1 429 ISITLSQFSFPHFKGGKYPGGRSFPSSIESTTIGSVHAEKLEAFCLVVIQKIKDASVW  
Vvi CBI30631.3 431 INVLCRLYEPHNEVGKPGNQPSLPSSEINCVQHSLETTKMEAFCLISVVKIKDASVW  
Vvi XP\_002273236.2 430 INVLCRLYEPHNEVGKPGNQPSLPSSEINCVQHSLETTKMEAFCLISVVKIKDASVW  
Fve XP\_004295562.1 419 ISALGQFCFLPYHKGKYLGERRSFSSSEVDSALNCSDTVKLEAFCEVSVVKIKDASVW  
Ppe EMJ12593.1 393 ISALGQLGFPYPHKGAKYLREDRSFPSSSEVDGALYCSVDVAKLEAFCLISVVKIKDASVW  
Consensus 481 .....\*.....\*.....\*.....\*.....\*.....\*.....\*.....\*.....\*.....\*

Ppa XP\_001764411.1 484 QSEVKA DH-----TEAIVKETTEGAG-----  
Sbi XP\_002451363.1 477 PGEVMVDAHIGAWV GELPNCFKREINSEDTAASGYFQHPD TLSEQENQSQSVPINIKM-SNL  
Osa BAD07831.1 474 TGDIMVDANIGAWV GELPEFKGINCD SHDDYVDLQSTGAISQGEQPSLVSSPIKMSSH  
Ata EMT06249.1 358 PGIIVVDENIGAWV GELPDCFKAINFGDNAASDDAQYSRVTIKENKNPLVSTPTGMTSHL  
Tur EMS59110.1 405 PGIIVVDENIGAWV GELPDCFKAINLGDNAASDDAQYSCVTIKENKNPLVSTPTMTSHL  
Sly XP\_004234099.1 494 PGDVVMGSGSSAWV GELPIYLNK---EMDSEVLDLNSSTPSEG-----  
Cru EOA37571.1 472 VGEITLESSIGAWV GEPDYLYKETS-RAKSVDDPVS SSSSLEEK-----  
Ath NP\_174175.2 477 VGEITLESSIGAWV GEPDYLYKETS-RAKSVDDHVT SSSSLEEI-----  
Aly XP\_002893534.1 479 VGEITLESSIGAWV GEPDYLYKETS-RAKSVDDHVT SSSSLEEK-----  
Csa XP\_004134942.1 493 HGDVRTGKRVGAWV GADPYLTVV--ESDIRSEDAPS GTIGEEN-----  
Gma XP\_003535421.1 481 SGEIKVEDGIGVWV GELPAYLR-----GEGVDLST-SEN-----  
Gma XP\_003541453.1 477 IGEIKVEDGIGVWV GELPAYLR-----GEGVDLST-SEN-----  
Mtr XP\_003593674.1 487 SDEIKVEDGIGAWV GELPVYLR-----GEGVDLSTSSSED-----  
Car XP\_004485849.1 511 SDEIKVD-GIGAWV GELPAYLR-----GEGVDLSTSSSED-----  
Rco XP\_002522507.1 478 PGIITITETSN GAWV GEPNYLKAM--GEYDSSKDDSS TSDPIEK-----  
Tca EOY28124.1 489 PGIITATETDLSAWV GEMPNYLKVPH-QANSSNEDDSASSADVGR-----  
Vvi CBI30631.3 491 SGEI MAESSV GAWV GDLPIYLRVD--KANHSGEDLSNGTALLQR-----  
Vvi XP\_002273236.2 490 SGEI MAESSV GAWV GDLPIYLRVD--KANHSGEDLSNGTALLQR-----  
Fve XP\_004295562.1 479 PGEITLERNV GAWV GKVPDYLRMAV-EDHLNNE DLS TISVPLDK-----  
Ppe EMJ12593.1 453 PGEIKMETDV GAWV GKVPNYLRMVV-EDSSNRE DLS TFS SSSSEK-----  
Consensus 541 . . . . .

Ppa XP\_001764411.1 505 -IDEQSEPVTEQPAAEQVYVSLQ-----FPSQNTL I STSGPALT VCGFLY--NQLSLSMS  
Sbi XP\_002451363.1 536 DQNDRTQETIQNIASFHVVISVEGKIVGFQPTNRPAVNHWATNPLATLLYQGRSLSPGVK  
Osa BAD07831.1 534 EQNDRTQETIQNIASFQVVMSEKIVGFQPTNRPAVNHWATNPLATLLYEGRKLSPAFI  
Ata EMT06249.1 418 EQNDRTQESIQNIASFQVVMSEKIVGFQPTSRPAVNHWAKNPLAALLYEGRKLSPAFI  
Tur EMS59110.1 465 EQNDRTQESIQNIASFQVVMSEKILVGFQPTSRPAVNHWAENPLAALLYEGRKLSPAFI  
Sly XP\_004234099.1 535 -IEDEMKAAGEDIASYQIVLSSGKTAGFQPTSRVAESOWEANPLKELYGTEKLSPLDI  
Cru EOA37571.1 515 -INEDAKASQDIATYQVVLSPGKIIGFQPTSRVAVNHWAANPLAKELYGKGLSPGLI  
Ath NP\_174175.2 520 -INEDAKASQDIATYQVVLSPGKIIGFQPTSRVAVNHWAANPLAKELYGKGLSPGLI  
Aly XP\_002893534.1 522 -INEDAKAAAQDIATYQVVLSPGKIIGFQPTSRVAVNHWAANPLAKELYGKGLSPGLI  
Csa XP\_004134942.1 535 -IDE-VKASQDIATYQVVLSPGKIIGFQPTSRVAVNHYAANPLAKELYGKGLSPGLI  
Gma XP\_003535421.1 515 -IDADAKVSDIATYQVVFSSGKIVGFQPLSRVAVNHWSVNPLAKELYGKGLSPGLI  
Gma XP\_003541453.1 511 -IDADAKVSDIATYQVVFSSGKIVGFQPLSRVAVNHWAANPLAKELYGKGLSPGLI  
Mtr XP\_003593674.1 522 -IDADAKVSDIATYQVVFSSGKIVGFQPLSRVAVNQWADNPLAKELYGKGLSPGLI  
Car XP\_004485849.1 545 -IDADVKVSQDIATYQVVFSSGKIVGFQPLSRVAVNQWADNPLAKELYGKGLSPGLI  
Rco XP\_002522507.1 520 -IDEDMKSSAQDIATYQVVLSPGKIIGFQPTSRVAVNHWAANPLAKELYGKGLSPGLI  
Tca EOY28124.1 532 -IDEDIKSSVQDIATYQVVLSPGKIIGFQPTSRVAVNHWAANPLAKELYGKGLSPGLI  
Vvi CBI30631.3 533 -SDEEKKTSQDIATYQVVLSPGKIIGFQPTSRVAVNHWAVNPLAKELYGKGLSPGLI  
Vvi XP\_002273236.2 532 -SDEEKKTSQDIATYQVVLSPGKIIGFQPTSRVAVNHWAVNPLAKELYGKGLSPGLI  
Fve XP\_004295562.1 522 -IDEDLKASAQDIATYQVVLSPGKIIGFQPLSRVAVNHWAANPLAKELYGKGLSPGLI  
Ppe EMJ12593.1 496 -IDEDLKASAQDIATYQVVLSPGKIIGFQPLSSVAVNHWAANPLAKELYGKGLSPGLI  
Consensus 601 . . . . .\*

Ppa XP\_001764411.1 557 RWRVCRCD-----PYSRDDCEV-----SGE-----VSE-----  
Sbi XP\_002451363.1 596 PPSIMESLLVIQEWGSALTA WKCIWVHGINGFCAY-----GSLSSVQYSAP-----  
Osa BAD07831.1 594 EPRLKISR-----PAKVVPHELLMSVNSPSEF-----ALVRPQDPC-----  
Ata EMT06249.1 478 EPRLKISR-----PAKVVPHELLMSVNSPSEF-----ALARPQDPC-----  
Tur EMS59110.1 525 EPRLKISR-----PAKVVPHELLMSVNSPSEF-----ALARPQDPC-----  
Sly XP\_004234099.1 594 EQGLKRSR-----GSDAVVHELLMSINPOSSEF-----ALVRPWTENSR-----  
Cru EOA37571.1 574 EPGLKSRP-----PTKVVVHELLMSVNSDRPE-----ALVRPPLPQ-----  
Ath NP\_174175.2 579 EPGLKSHP-----PKKVVVHELLMSVNSDRPE-----ALVRPPLPQ-----  
Aly XP\_002893534.1 581 EPGLKSHP-----PKKVVVHELLMSVNSDRPE-----ALVRPPLPQ-----  
Csa XP\_004134942.1 593 ETGLRIER-----PNEVVVHELLMSVKTDAFE-----ALARPYY-----  
Gma XP\_003535421.1 574 EPGLKVSL-----PEKVTVHELLMSINPDAYE-----ALARFR-----  
Gma XP\_003541453.1 570 EPGLKVPL-----PEKVTVHELLMSINPDAYE-----ALARFR-----  
Mtr XP\_003593674.1 581 EPGLRIHL-----PKEVTVHELLSVKPDAYE-----ALAREYQ-----  
Car XP\_004485849.1 604 EPGLRVLL-----PEKVTVHELLMSVVKPDVYE-----ALAREYQ-----  
Rco XP\_002522507.1 579 EPGLKIRP-----PSETVVHELLMSLWADWHYRNLTASLEGSHECAPGSKFIHL  
Tca EOY28124.1 591 ERGLKIRL-----PNEVVVHELLMSVNPDSCE-----ALARPQ-----  
Vvi CBI30631.3 592 ETGLKIPR-----PNEVVVHELLMSVNSDAFE-----ALARPQ-----  
Vvi XP\_002273236.2 591 ETGLKIPR-----PNEVVVHELLMSVNSDAFE-----ALARPQ-----  
Fve XP\_004295562.1 581 EPGLKVQC-----PDEAVVHELLMSVVKPDASE-----ALARPVR-----  
Ppe EMJ12593.1 555 EPGLKVQR-----PNEVAVVHELLMSVVKPDACE-----ALARPVR-----  
Consensus 661 . . . . .



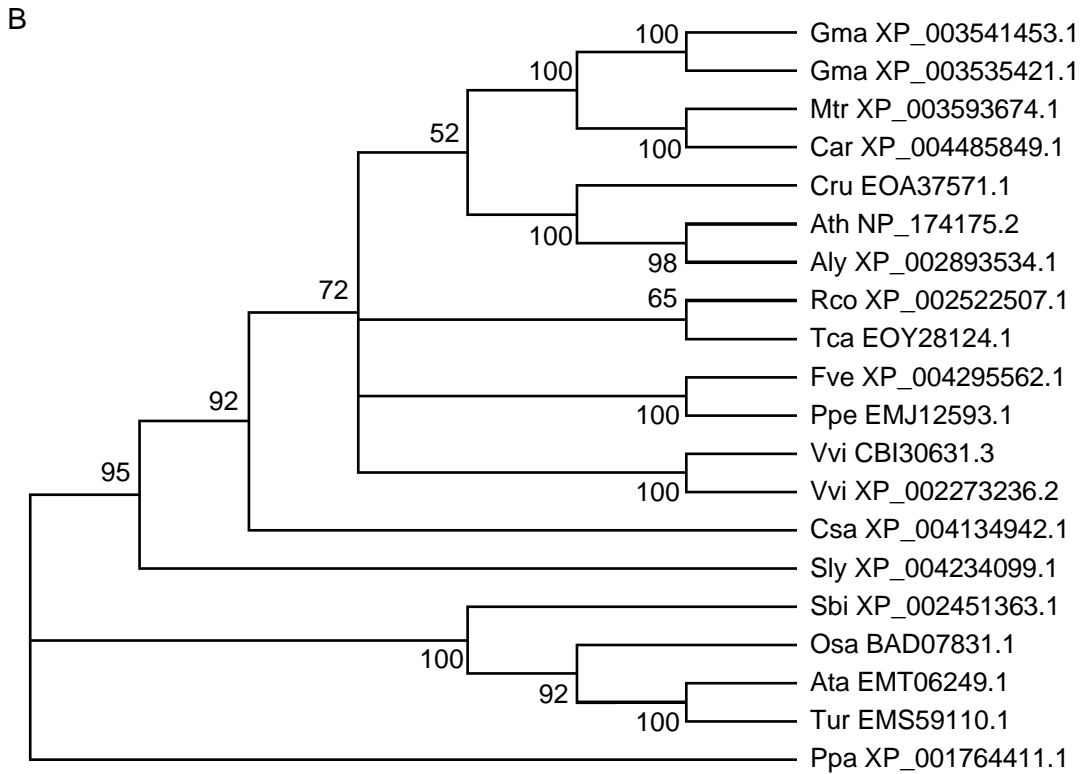

**Supplementary Figure S4.** Phylogenetic analysis of ANU10 and its putative orthologs. (A) Alignment of the amino acid sequences of the Arabidopsis ANU10 protein and its orthologs in other plant species. Identical and closely related residues that are conserved in >50% of the sequences are shaded black and grey, respectively. Asterisks and dots indicate positions with totally identical or similar residues, respectively, among the orthologs. Numbers indicate residue positions. Amino acids drawn in red and green correspond to the chloroplast transit peptides as predicted by ChloroP1.1 and the transmembrane domains as predicted by SOSUI, respectively. Protein sequences were retrieved from NCBI. The multiple sequence alignment was first made using T-Coffee, subsequently refined using MUSCLE and finally shaded with BOXSHADE 3.21. (B) Unrooted tree showing the evolutionary history of ANU10 and homologous proteins. Analysis of 20 homologs was carried out with MEGA5 following the Neighbor-Joining method. The evolutionary distances were calculated using the Poisson correction method. A bootstrap consensus tree was inferred from 1000 replicates. Numbers correspond to bootstrap percentages. Branches corresponding to partitions reproduced in less than 50% bootstrap replicates were condensed. Plant species and identities (%) between ANU10 and each of its orthologs are: Ppa, *Physcomitrella patens* (18.06%); Sbi, *Sorghum bicolor* (29.46); Osa, *Oryza sativa* (32.00); Ata, *Aegilops tauschii* (28.17); Tur, *Triticum urartu* (28.95); Sly, *Solanum lycopersicum* (45.51); Cru, *Capsella rubella* (85.76); Ath, *Arabidopsis thaliana*; Aly, *Arabidopsis lyrata* (89.98); Csa, *Cucumis sativus* (48.18); Gma, *Glycine max* (52.83 for XP\_003541453.1 and 52.97 for XP\_003535421.1); Mtr, *Medicago truncatula* (52.15); Car, *Cicer arietinum* (49.85); Rco, *Ricinus communis* (50.94); Tca, *Theobroma cacao* (52.47); Vvi, *Vitis vinifera* (52.55 for CBI30631.3 and 52.39 for XP\_002273236.2); Fve, *Fragaria vesca* (54.84) and Ppe, *Prunus persica* (52.58).

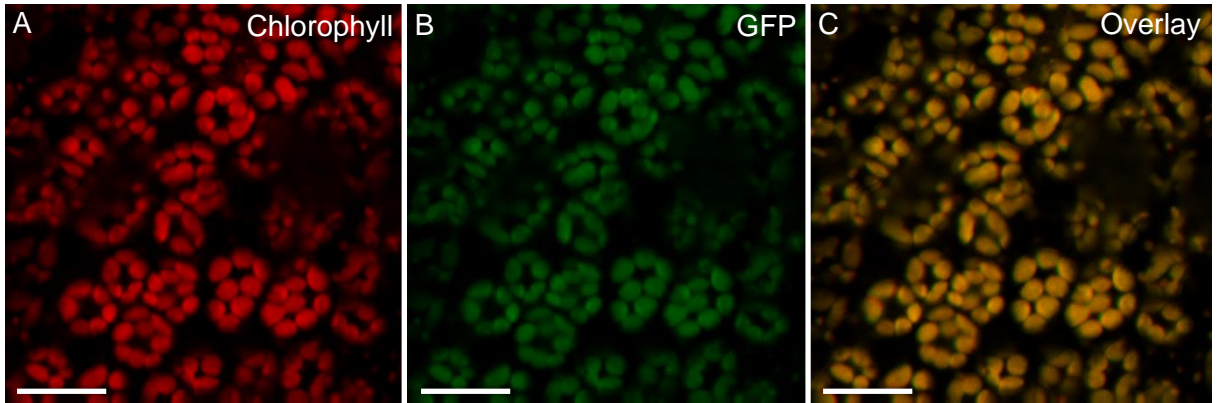

**Supplementary Figure S5.** Subcellular localization of the ANU10:GFP fusion protein in the *anu10-1 ANU10<sub>pro</sub>:ANU10:GFP* transgenic line. Confocal micrographs of the subepidermal layer of mesophyll cells showing (A) chlorophyll autofluorescence of the chloroplasts, (B) GFP fluorescence and (C) an overlay of the chlorophyll and GFP signals. Pictures were taken from first-node leaves collected 16 das. Scale bars indicate 20  $\mu\text{m}$ .

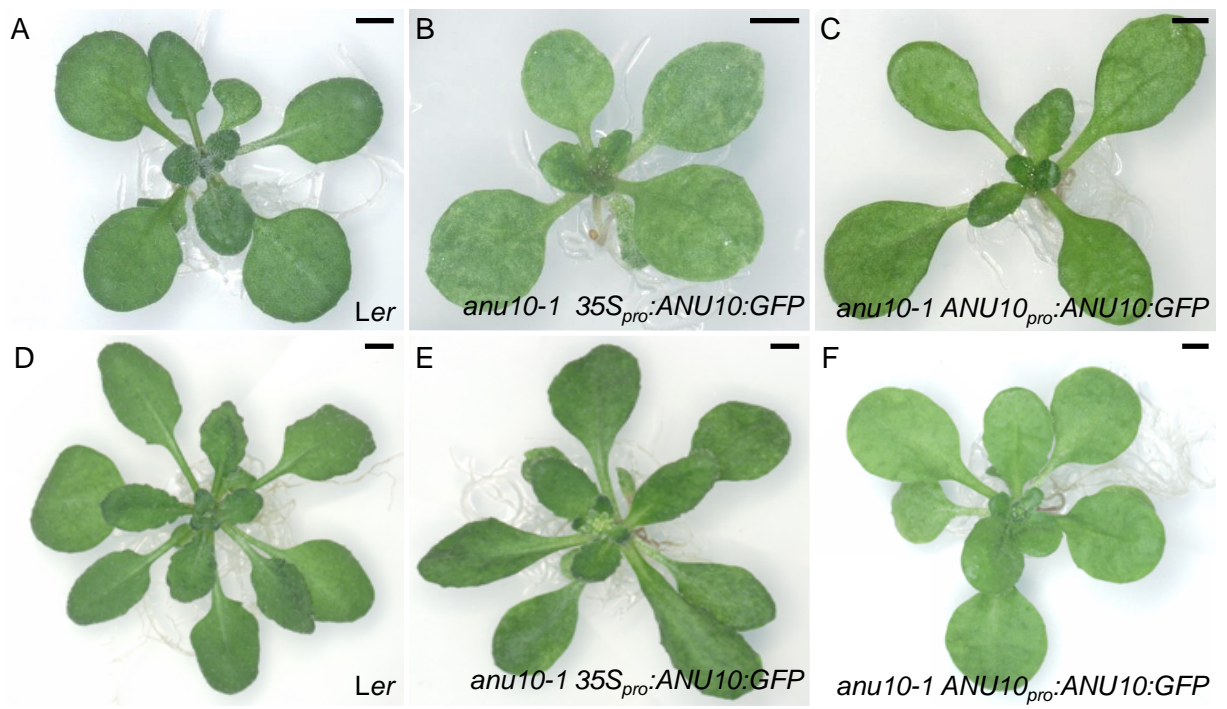

**Supplementary Figure S6.** Phenotypic rescue of *anu10-1* by the ANU10:GFP fusion protein. Pictures were taken (A-C) 16 and (D-F) 21 das. Scale bars indicate 2 mm.

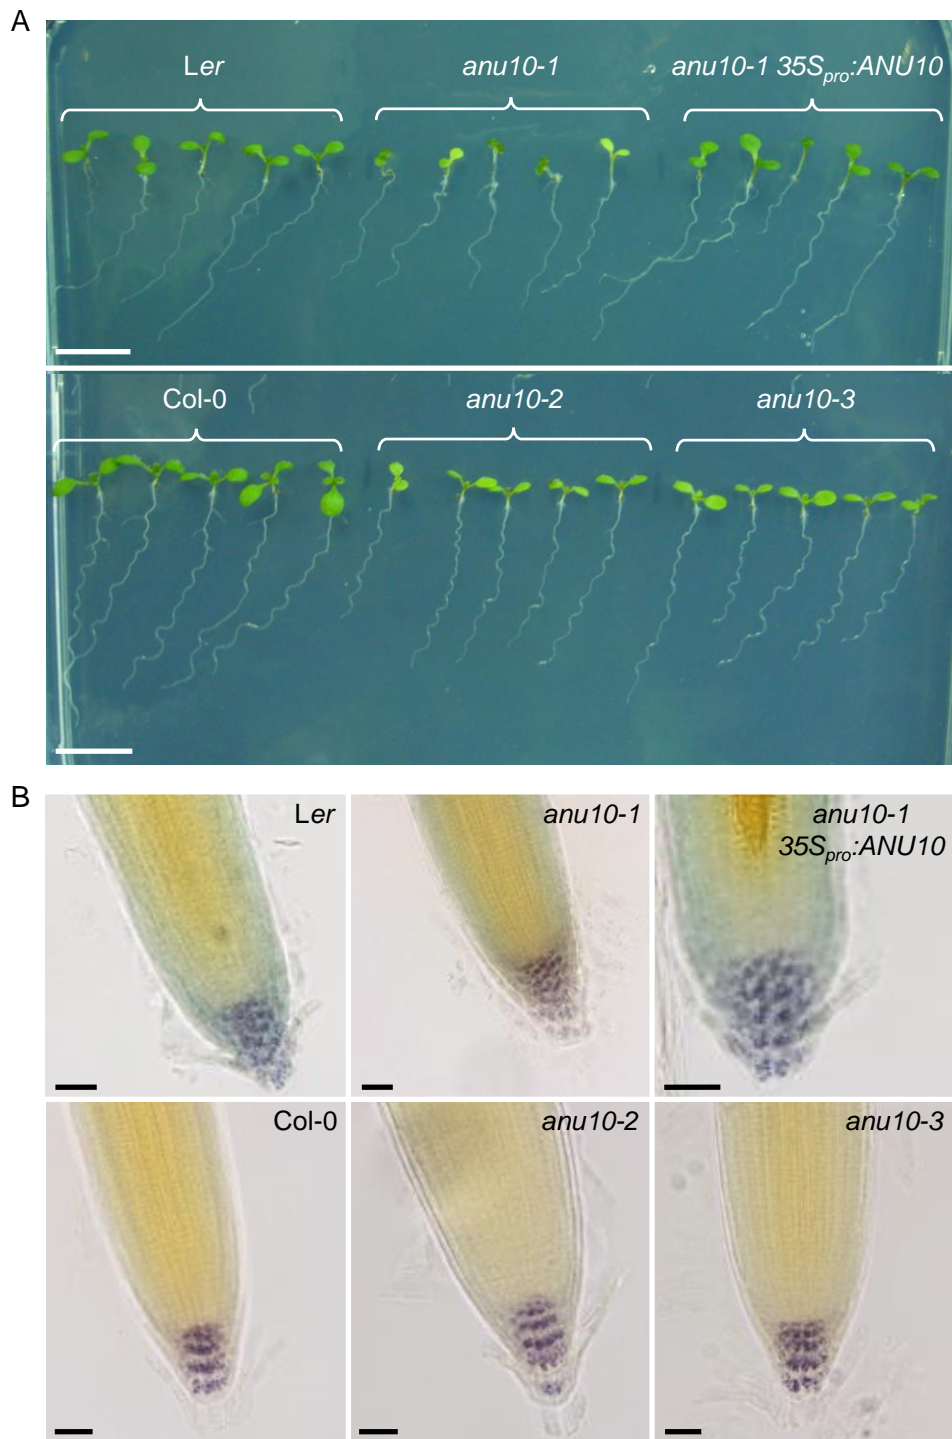

**Supplementary Figure S7.** Growth and starch content of *anu10* roots. (A) Plants grown on vertically oriented agar plates. (B) Lugol staining of root apices. Pictures were taken (A) 7 and (B) 9 das. Scale bars indicate (A) 1 cm and (B) 100  $\mu$ m.

**Supplementary Table S1.** Primer sets used in this work

| Purpose                  | Oligonucleotide name(s) | Oligonucleotide sequences (5'→3')                      |                                                        |
|--------------------------|-------------------------|--------------------------------------------------------|--------------------------------------------------------|
|                          |                         | Forward primer (F)                                     | Reverse primer (R)                                     |
| Linkage analysis         | AthZFPG_F/R             | TTGCGTTTCCACATTTGTTTAAAC                               | AGAAATGGGTCAATTCACATGTA                                |
|                          | SNP10026_F/R            | CAAGCCCTCTTATGCTTTAGAAA                                | ACTATTGACTTCGTGTTAACAAAG                               |
|                          | nga392_F/R              | TTGAATAATTTGTAGCCATGTTAAT                              | GGGGTGTTAAATGCGGTGTTG                                  |
|                          | F3M18_F/R               | GCTGTCAATTTAGGGCATTGA                                  | AAAAGTTGGTTTGAAAAAGTTGAGA                              |
|                          | F1K23_F/R               | CCTGTCAAGGGGTCGTAGTC                                   | TTGTGCCTCATCTTCTCGTG                                   |
|                          | cer479911_F/R           | CAAATAGAACCAACACCGTAAA                                 | ATTCACTTTCCAATAGATCACTC                                |
|                          | SO392_F/R               | GACGATATCTTCCTGCGAAAGA                                 | TGTAAAGAGAAGCAGAGTGTCG                                 |
| <i>ANU10</i> sequencing  | ANU10_F1/R1             | TGGGGAAATACGGTTTTGAG                                   | CGAGATGCTGATATGTTGTGTG                                 |
|                          | ANU10_F2/R2             | AGGACTGGCAATTGGTTCTG                                   | TTTCGCCGACGAAGAAGTAT                                   |
|                          | ANU10_F3/R3             | AGAGCGGAGATGCATATAACT                                  | TTATTTTGGAGACATGTTATGAG                                |
|                          | ANU10_R4                |                                                        | GGAATTGATACTGATAGGTTG                                  |
| Topo and Gateway cloning | ANU10cds_F/R            | CACCATGGCTTCCATTTCTACTGCT                              | TTGTGGCAATAATGGTCTGAC                                  |
|                          | ANU10cds_F2/R2          | GCAGCTGTGGAACCTCCAGC                                   | ACAGTACCAACGAGACTGAGC                                  |
|                          | ANU10cds_F3             | ATCCTTTAGCTAGAGAACTTTATG                               |                                                        |
|                          | ANU10pro_F/R            | GGGGACAAGTTTGTACAAAAAAGCAGGCT<br>TTGCTGCTCTGCATAGACACA | GGGGACCACTTTGTACAAGAAAGCTGGGT<br>GAATGGAAGCCATTGACGAAC |
|                          | ANU10pro_F2             | CGCAGATACGGAATCATTTTTCT                                |                                                        |
|                          | ANU10cds-pro            | TCTGTTTCGTCAATGGCTTCCATTTCTACTGCTT                     |                                                        |
|                          | ANU10pro-cds            | ATGGAAGCCATTGACGAACAGATAAAAATCACAGA                    |                                                        |
| qRT-PCR                  | M13_F/R                 | GTAAAACGACGGCCAG                                       | CAGGAAACAGCTATGACCATGATT                               |
|                          | 18S RRNA_F/R            | GGTGGTGGTGCATGGCCGTTCTT                                | GACGGGCGGTGTGTACAAAGGGC                                |
|                          | LHCB1_F/R <sup>1</sup>  | GCCTTCGCTACCAACTTCGTC                                  | AACCGGATACACAACTCGATC                                  |
|                          | LHCB2_F/R               | CTCAAAGCATCTGGTACGGA                                   | CGGTTAGGTAGGACGGTGT                                    |
|                          | LHCB3_F/R               | AGTACACTATGGGAAATGATCT                                 | GTGAGGTAAGACGGAGTTTG                                   |
|                          | LHCB5_F/R               | GGTATGGTCCTGACAGGAG                                    | CTTCTTTCCAAGACCAAATGG                                  |

|                                            |                        |                                     |                                |
|--------------------------------------------|------------------------|-------------------------------------|--------------------------------|
| qRT-PCR                                    | HEMA1_F/R <sup>2</sup> | GTGAGCTCTCTGCTTCTTCTGATTCTG         | CTGCTTCTTTTCTTTGTATATCGATCAGCT |
|                                            | ORE1_F/R <sup>3</sup>  | CTTACCATGGAAGGCTAAGATGGG            | TCGGGTATTTCCGGTCTCTCAC         |
|                                            | accD_F/R <sup>4</sup>  | GCTAAGTAAAGCAATGGATAGTTT            | CGAATGTCCTTGGAGCTAACTAA        |
|                                            | rbcL_F/R <sup>5</sup>  | GTGTTGGGTTCAAAGCTGGT                | CATCGGTCCACACAGTTGTC           |
|                                            | psbA_F/R <sup>5</sup>  | GAGCAGCAATGAATGCGATA                | CCTATGGGGTCGCTTCTGTA           |
|                                            | rrn16_F/R <sup>5</sup> | CGGTATCTGGGAATAAGCA                 | GATTTGACGGCGGACTTAAA           |
|                                            | rrn23_F/R <sup>5</sup> | GGGCGACTGTTTACCAAAAA                | TTACCCGACAAGGAATTTTCG          |
|                                            | atpB_F/R <sup>5</sup>  | GAGCTCGTATGAGAGTTGGT                | ACCCAATAAGGCGGATACCT           |
| Genotyping of mutant and transgenic plants | LB1_F <sup>a</sup>     | GCCTTTTTCAGAAATGGATAAATAGCCTTGCTTCC |                                |
|                                            | N831342_F/R            | TGTGTCAACCAGATTGGTCAG               | TTGCTAGGTTTCATTCCCACAC         |
|                                            | N828696_F/R            | TTTACTGTATTGCCGAATCGC               | AGCGAAGTTAACCTCTCGAGG          |
|                                            | 35S_F <sup>b</sup>     | GACAGTGGTCCCAAAGATG                 |                                |
|                                            | GFP_R <sup>c</sup>     |                                     | TATGTTGCATCACCTTCACCCT         |
|                                            | GUS_R <sup>d</sup>     |                                     | CACAAACGGTGATACGTACACT         |

<sup>a-d</sup>Each of these oligonucleotides was used together with: <sup>a</sup>N831342\_R and N828696\_R to genotype the *anu10-2* and *anu10-3* mutants; <sup>b</sup>ANU10cds\_R2, <sup>c</sup>ANU10cds\_F2 or ANU10cds-pro, and <sup>d</sup>ANU10pro\_F2 to genotype transgenic plants putatively carrying the <sup>b</sup>35S<sub>pro</sub>:ANU10, <sup>c</sup>35S<sub>pro</sub>:ANU10:GFP or ANU10<sub>pro</sub>:ANU10:GFP, and <sup>d</sup>ANU10<sub>pro</sub>:GUS transgenes.<sup>1</sup>Adhikari *et al.* (2011), <sup>2</sup>Mochizuki *et al.* (2008), <sup>3</sup>Rauf *et al.* (2013), <sup>4</sup>Hricová *et al.* (2006), <sup>5</sup>Gao *et al.* (2011).

**Supplementary Table S2.** Transmembrane domains and chloroplast transit peptides in the ANU10 protein and its putative orthologs

| Organism                     | Protein <sup>a</sup> | Protein length (aa) | Transmembrane domains <sup>b</sup> |               | Chloroplast transit peptides <sup>c</sup> |                          |
|------------------------------|----------------------|---------------------|------------------------------------|---------------|-------------------------------------------|--------------------------|
|                              |                      |                     | Number                             | Coordinates   | Presence                                  | Length (aa) <sup>c</sup> |
| <i>Physcomitrella patens</i> | XP_001764411.1       | 579                 | 1                                  | 417-439       | No                                        | -                        |
| <i>Sorghum bicolor</i>       | XP_002451363.1       | 642                 | 0                                  | -             | Yes                                       | 59                       |
| <i>Oryza sativa</i>          | BAD07831.1           | 630                 | 1                                  | 400-422       | Yes                                       | 45                       |
| <i>Aegilops tauschii</i>     | EMT06249.1           | 514                 | 2                                  | 2-24, 284-306 | No                                        | -                        |
| <i>Triticum urartu</i>       | EMS59110.1           | 561                 | 1                                  | 331-353       | No                                        | -                        |
| <i>Solanum lycopersicum</i>  | XP_004234099.1       | 631                 | 1                                  | 416-438       | Yes                                       | 46                       |
| <i>Capsella rubella</i>      | EOA37571.1           | 609                 | 1                                  | 396-418       | Yes                                       | 34                       |
| <i>Arabidopsis thaliana</i>  | NP_174172.2          | 614                 | 1                                  | 421-443       | Yes                                       | 37                       |
| <i>Arabidopsis lyrata</i>    | XP_002893534         | 616                 | 1                                  | 404-426       | Yes                                       | 55                       |
| <i>Cucumis sativus</i>       | XP_004134942.1       | 627                 | 0                                  | -             | Yes                                       | 50                       |
| <i>Glycine max</i>           | XP_003535421.1       | 607                 | 1                                  | 408-430       | Yes                                       | 38                       |
| <i>Glycine max</i>           | XP_003541453.1       | 603                 | 1                                  | 404-426       | Yes                                       | 34                       |
| <i>Medicago truncatula</i>   | XP_003593674.1       | 614                 | 0                                  | -             | Yes                                       | 63                       |
| <i>Cicer arietinum</i>       | XP_004485849.1       | 637                 | 1                                  | 436-458       | Yes                                       | 83                       |
| <i>Ricinus communis</i>      | XP_002522507.1       | 628                 | 1                                  | 403-425       | Yes                                       | 54                       |
| <i>Theobroma cacao</i>       | EOY28124.1           | 624                 | 0                                  | -             | Yes                                       | 46                       |
| <i>Vitis vinifera</i>        | CBI30631.3           | 666                 | 1                                  | 415-437       | Yes                                       | 45                       |
| <i>Vitis vinifera</i>        | XP_002273236.2       | 624                 | 1                                  | 414-436       | Yes                                       | 45                       |
| <i>Fragaria vesca</i>        | XP_004295562.1       | 614                 | 1                                  | 403-425       | Yes                                       | 56                       |
| <i>Prunus persica</i>        | EMJ12593.1           | 588                 | 0                                  | -             | No                                        | -                        |

<sup>a</sup>GeneBank accession number. <sup>b,c</sup>Predictions shown in this table were obtained from <sup>b</sup>SOSUI and <sup>c</sup>ChloroP 1.1.

## Supplementary Data References

- Adhikari ND, Froehlich JE, Strand DD, Buck SM, Kramer DM, Larkin RM.** 2011. GUN4-porphyrin complexes bind the ChlH/GUN5 subunit of Mg-Chelatase and promote chlorophyll biosynthesis in Arabidopsis. *Plant Cell* **23**, 1449-1467.
- Gao ZP, Yu QB, Zhao TT, Ma Q, Chen GX, Yang ZN.** 2011. A functional component of the transcriptionally active chromosome complex, Arabidopsis pTAC14, interacts with pTAC12/HEMERA and regulates plastid gene expression. *Plant Physiology* **157**, 1733-1745.
- Hricová A, Quesada V, Micol JL.** 2006. The SCABRA3 nuclear gene encodes the plastid RpoTp RNA polymerase, which is required for chloroplast biogenesis and mesophyll cell proliferation in Arabidopsis. *Plant Physiology* **141**, 942-956.
- Mochizuki N, Tanaka R, Tanaka A, Masuda T, Nagatani A.** 2008. The steady-state level of Mg-protoporphyrin IX is not a determinant of plastid-to-nucleus signaling in *Arabidopsis*. *Proceedings of the National Academy of Sciences of the United States of America* **105**, 15184-15189.
- Rauf M, Arif M, Dortay H, Matallana-Ramirez LP, Waters MT, Gil Nam H, Lim PO, Mueller-Roeber B, Balazadeh S.** 2013. ORE1 balances leaf senescence against maintenance by antagonizing G2-like-mediated transcription. *EMBO Reports* **14**, 382-388.
